# Supplementary material for: Unique allosteric effect-driven rapid adsorption of carbon dioxide in a newly designed ionogel [P4444][2-Op]@MCM-41 with excellent cyclic stability and loading-dependent capacity
Source: Royal Society of Chemistry journal article supplement (doi:10.1039/c6ta10693e), 2017-01-01
Supplement: c6ta10693e1.pdf [file c6ta10693e1.pdf]

## Supporting Information

### Unique allosteric effect driven rapid absorption of carbon dioxide on a new ionogel [P<sub>4444</sub>][2-Op]@MCM-41 with excellent cyclic stability and loading-dependent capacity

Chunfeng Xue<sup>a\*</sup>, Hongye Zhu<sup>a</sup>, Xiao Du<sup>a</sup>, Xiaowei An<sup>a</sup>, Enyang Wang<sup>a</sup>, Donghong Duan<sup>a</sup>, Lijuan Shi<sup>a</sup>, Xiaogang Hao<sup>a\*</sup>, Bo Xiao<sup>b</sup>, Changjun Peng<sup>c</sup>

<sup>a</sup> Department of Chemical Engineering, Taiyuan University of Technology, Taiyuan 030024, Shanxi, P. R. China

<sup>b</sup> School of Chemistry and Chemical Engineering, Queen's University Belfast, Belfast, BT7-1NN, Northern Ireland, UK

<sup>c</sup> State Key Laboratory of Chemical Engineering and Department of Chemistry, East China University of Science and Technology, Shanghai, 200237, P. R. China

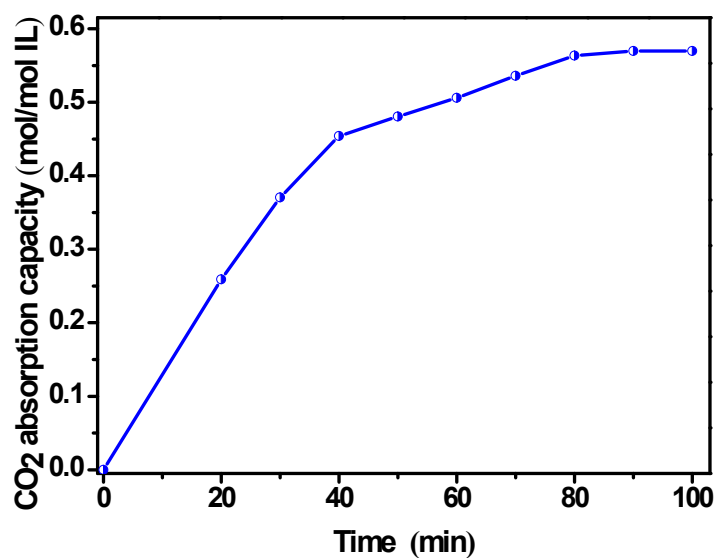

Fig. S1 Absorption isotherm curve from bubble CO<sub>2</sub> in the pure IL [P<sub>4444</sub>][2-Op] at 50 °C and ordinary pressure

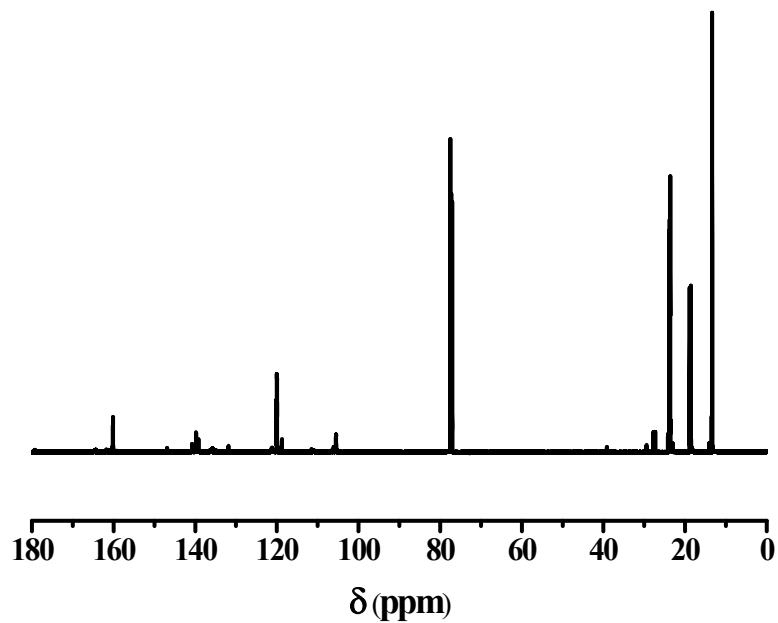

Fig. S2  $^{13}\text{C}$  NMR of the IL [P<sub>4444</sub>][2-Op]

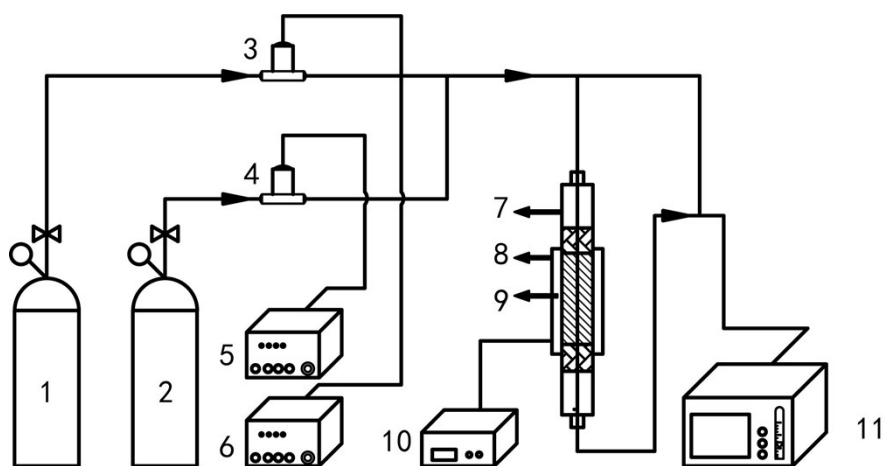

1. CO<sub>2</sub> cylinder; 2. N<sub>2</sub> cylinder; 3. CO<sub>2</sub> mass flow controller; 4. N<sub>2</sub> mass flow controller; 5. Flow readout box; 6. Flow readout box; 7. Sample cell; 8. Heating jacket; 9. Adsorbent; 10. Temperature controller; 11. Gas analyzer.

Fig. S3. Diagram of the CO<sub>2</sub> adsorption setup at atmospheric pressure

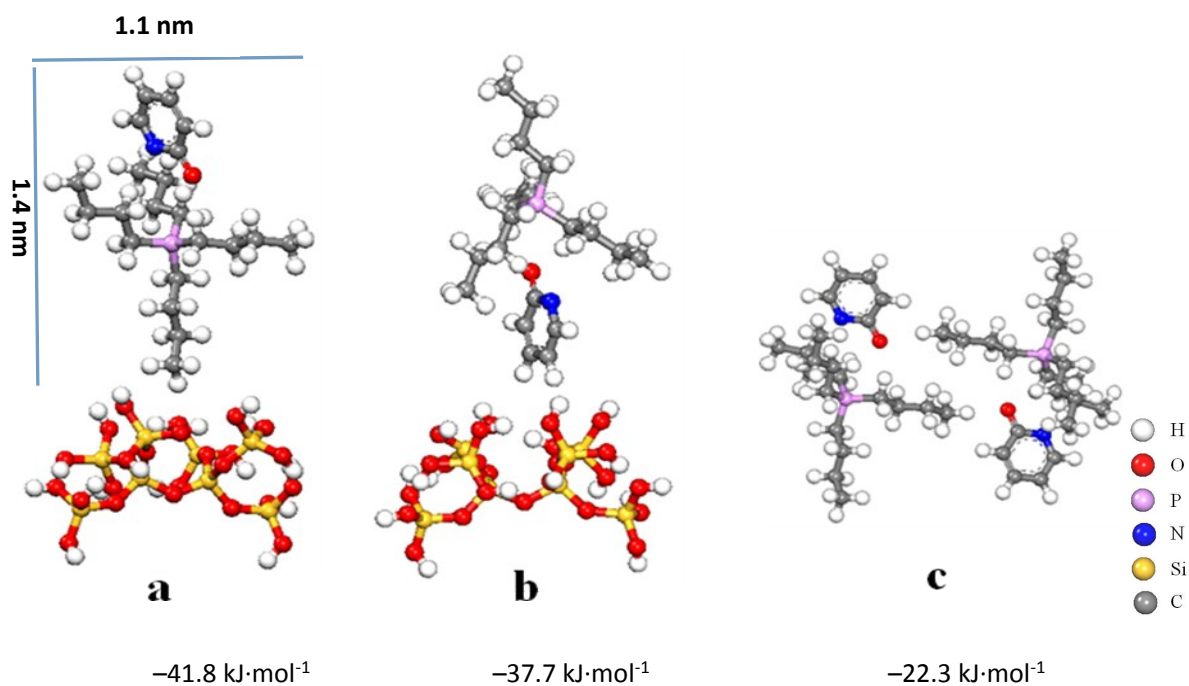

**Fig. S4.** Bonding styles and bounding energy: (a) [P<sub>4444</sub>] cation of IL [P<sub>4444</sub>][2-Op] close to the surface of silica MCM-41, (b) [2-Op] anion IL [P<sub>4444</sub>][2-Op] close to the surface of silica MCM-41, and (c) the two IL pair of [P<sub>4444</sub>][2-Op] arranged with staggered structure.

**Table S1.** Mulliken atomic charges in different circumstance of materials

| Material                   | Group | Mulliken atomic charge |               |
|----------------------------|-------|------------------------|---------------|
|                            |       | Before loading         | After loading |
| [P <sub>4444</sub> ][2-Op] | N     | -0.452                 | -0.478        |
|                            | O     | -0.638                 | -0.643        |
|                            | OH(1) | -0.365                 | -0.368        |
|                            | OH(2) | -0.364                 | -0.365        |
| MCM-41                     | OH(3) | -0.420                 | -0.422        |
|                            | OH(4) | -0.392                 | -0.395        |
|                            | OH(5) | -0.407                 | -0.410        |
|                            | OH(6) | -0.329 <sup>c</sup>    | -0.368        |

**Table S2** Comparison of CO<sub>2</sub> absorption capacities of absorbents at ordinary pressure

| Sample                                                    | Adsorption Temperature | Adsorption time (min.) | Capacity, (mmol/g) | Reference  |
|-----------------------------------------------------------|------------------------|------------------------|--------------------|------------|
| 5%[P <sub>4444</sub> ][2-Op]/MCM-41                       | 50 °C                  | 4.67                   | 1.21               | This study |
| 33.3%BMIMCl/ZrP                                           | 60 °C                  | 180                    | 0.73               | 1          |
| 33.3%BMIMCl/MMT                                           | 70 °C                  |                        | 0.42               |            |
| 15%PAP/MCM-41                                             | 120 °C                 | Unavailable            | 0.48               | 2          |
| 15%PA/MCM-41                                              |                        |                        | 0.37               |            |
| 50%[P <sub>66614</sub> ][2-Op]/MCM-41                     | 19 °C                  | 240                    | 0.905              | 3          |
| [P(C <sub>4</sub> ) <sub>4</sub> ][Gly]/8SiO <sub>2</sub> | 25 °C                  | 800                    | 0.205              | 4          |
| 50% [EMIM][Arg]/PMMA                                      | 40 °C                  | 45                     | 1.01               |            |
| 50% [EMIM][Ala]/PMMA                                      | 40 °C                  | 45                     | 1.38               |            |
| 50% [EMIM][Gly]/PMMA                                      | 25 °C                  | 45                     | 1.71               | 5          |
| 50% [EMIM][Gly]/PMMA                                      | 40 °C                  | 45                     | 1.53               |            |
| 50% [EMIM][Gly]/PMMA                                      | 80 °C                  | 45                     | 1.02               |            |
| 25%SALG-AT-EZT3/SiO <sub>2</sub>                          | 40 °C                  | 333.33                 | 2.01               | 6          |
| 25%EZT3/ZSM-5                                             | 40 °C                  | 333.33                 | 2.93               |            |
| 25%EZT3/Nano-SiO <sub>2</sub>                             | 40 °C                  | 333.33                 | 3.38               | 7          |
| 25%EZT3/Fumed SiO <sub>2</sub>                            | 40 °C                  | 333.33                 | 2.74               |            |
| 25%Arg/PMMA                                               | 40 °C                  | 333.33                 | 1.3                | 8          |
| 50%DBUOH/silica gel                                       | 25 °C                  | 300                    | 1.93               | 9          |
| 40% DBUOH/MCM-41                                          | 25 °C                  | 300                    | 1.85               |            |
| 60% DBUOH/SBA-15                                          | 25 °C                  | 300                    | 2.49               |            |
| 50%EZT3/SBA-15                                            | 40 °C                  | Unavailable            | 4.7                | 10         |
| 60%TM/MCM-41                                              | 55 °C                  | 60                     | 3.706              | 11         |

The quantum chemical calculation was performed using the DMOL3 module included in the Accelrys Material Studio 6.0 software package. GGA/PBE/DNP+ with an all-electron method was used for these calculations.

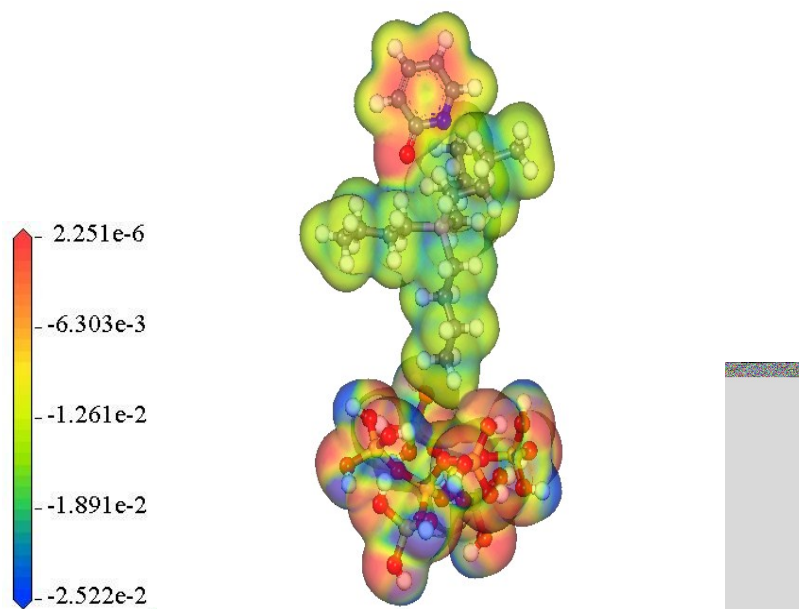

**Fig. S5** The surface electrostatic potential of [P<sub>4444</sub>] cation of [P<sub>4444</sub>][2-Op] IL close to the surface of silica MCM-41.

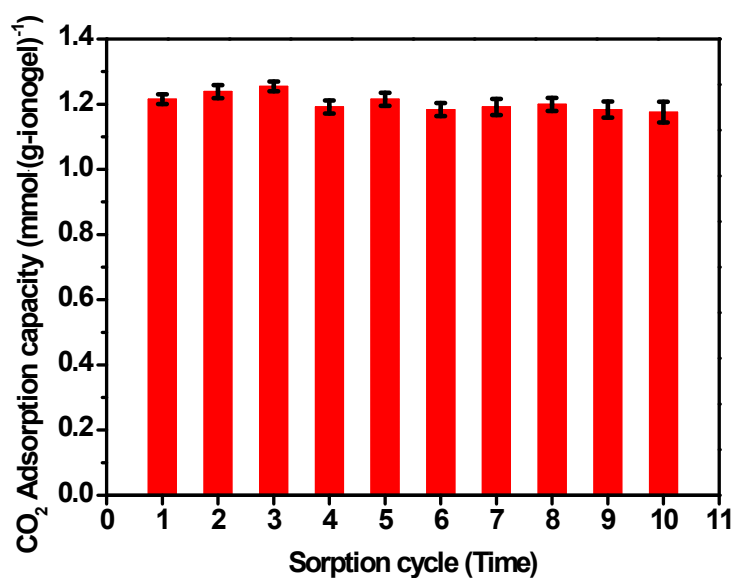

**Fig. S6** Ten cycles of CO<sub>2</sub> adsorption/desorption capacity of the ionogel PM-5 at 50 °C

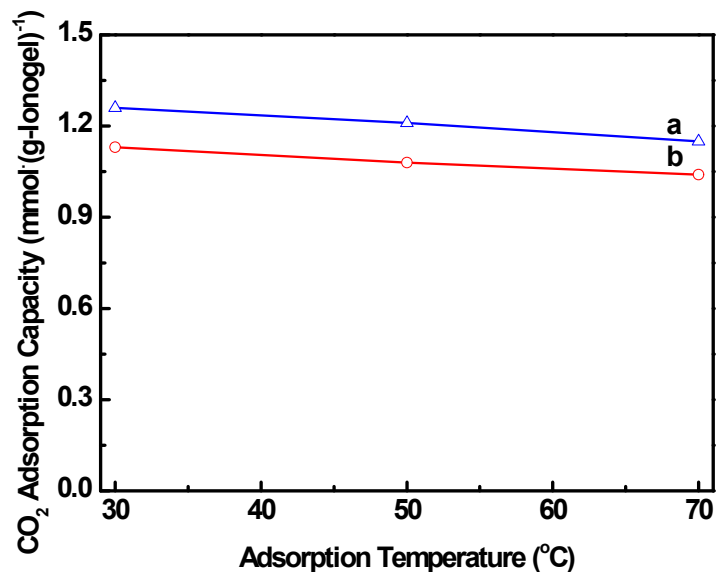

**Fig. S7.** CO<sub>2</sub> adsorption capacity of ionogel PM-5 recorded in gas mixture with CO<sub>2</sub> partial pressure of 0.1435 (a) and 0.0988 (b) at different temperatures of 30, 50, and 70 °C.

#### References:

1. Y. Zhou, J. Liu, M. Xiao, Y. Meng and L. Sun, *ACS Applied Materials & Interfaces*, 2016, **8**, 5547-5555.
2. M. M. Wan, H. Y. Zhu, Y. Y. Li, J. Ma, S. Liu and J. H. Zhu, *ACS Applied Materials & Interfaces*, 2014, **6**, 12947-12955.
3. J. Cheng, Y. Li, L. Hu, J. Zhou and K. Cen, *Energy & Fuels*, 2016, **30**, 3251-3256.
4. J. Zhang, S. Zhang, K. Dong, Y. Zhang, Y. Shen and X. Lv, *Chemistry – A European Journal*, 2006, **12**, 4021-4026.
5. X. Wang, N. G. Akhmedov, Y. Duan, D. Luebke and B. Li, *Journal of Materials Chemistry A*, 2013, **1**, 2978-2982.
6. I. H. Arellano, S. H. Madani, J. Huang and P. Pendleton, *Chemical Engineering Journal*, 2016, **283**, 692-702.

7. I. H. Arellano, J. Huang and P. Pendleton, *RSC Advances*, 2015, **5**, 65074-65083.
8. B. Jiang, X. Wang, M. L. Gray, Y. Duan, D. Luebke and B. Li, *Applied Energy*, 2013, **109**, 112-118.
9. S. Lee, S.-Y. Moon, H. Kim, J.-S. Bae, E. Jeon, H.-Y. Ahn and J.-W. Park, *RSC Advances*, 2014, **4**, 1543-1550.
10. I. H. Arellano, J. Huang and P. Pendleton, *Chemical Engineering Journal*, 2015, **281**, 119-125.
11. X. Zhang, X. Zheng, S. Zhang, B. Zhao and W. Wu, *Industrial & Engineering Chemistry Research*, 2012, **51**, 15163-15169.
